# Supplementary material for: One step hydrothermal synthesis of a rGO–TiO2 nanocomposite and its application on a Schottky diode: improvement in device performance and transport properties
Source: Royal Society of Chemistry journal article supplement (doi:10.1039/c5ra17795b), 2015-01-01
Supplement: c5ra17795b1.pdf [file c5ra17795b1.pdf]

## *Supporting Information*

### **One step hydrothermal synthesis of rGO-TiO<sub>2</sub> nanocomposite and its application on Schottky diode: improvement in device performance and transport properties**

**Mrinmay Das<sup>a</sup>, Joydeep Datta<sup>a</sup>, Arka Dey<sup>a</sup>, Rajkumar Jana<sup>a</sup>, Animesh Layek<sup>a,c</sup>, Somnath Middya<sup>a,b</sup> and Partha Pratim Ray<sup>\*a</sup>**

<sup>a</sup> Department of Physics, Jadavpur University, Kolkata – 700 032, India

<sup>b</sup> Department of Physics, Bankim Sardar College, Tangrakhali, South 24-paraganas, pin 743329, India

<sup>c</sup> Department of Physics, Bejoy Narayan Mahavidyalaya, Itachuna, Hooghly-712147, India

\*Corresponding Author, e-mail: partha@phys.jdvu.ac.in;

Phone: +91-9475237259; Fax: +91-3324138917

---

The XRD spectrum of rGO is given in Fig. S1.

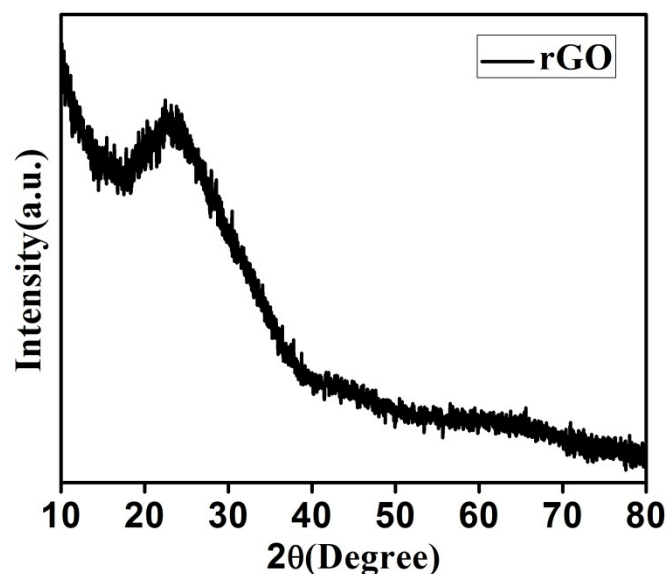

**Fig. S1** XRD spectra of rGO

The I-V curves for the two Schottky diodes fabricated with rGO-TiO<sub>2</sub> (1:15) and rGO-TiO<sub>2</sub> (1:50) are shown in Fig. S2. Both devices showed higher rectification ratio and photosensitivity than pure TiO<sub>2</sub>, as shown in Table S1.

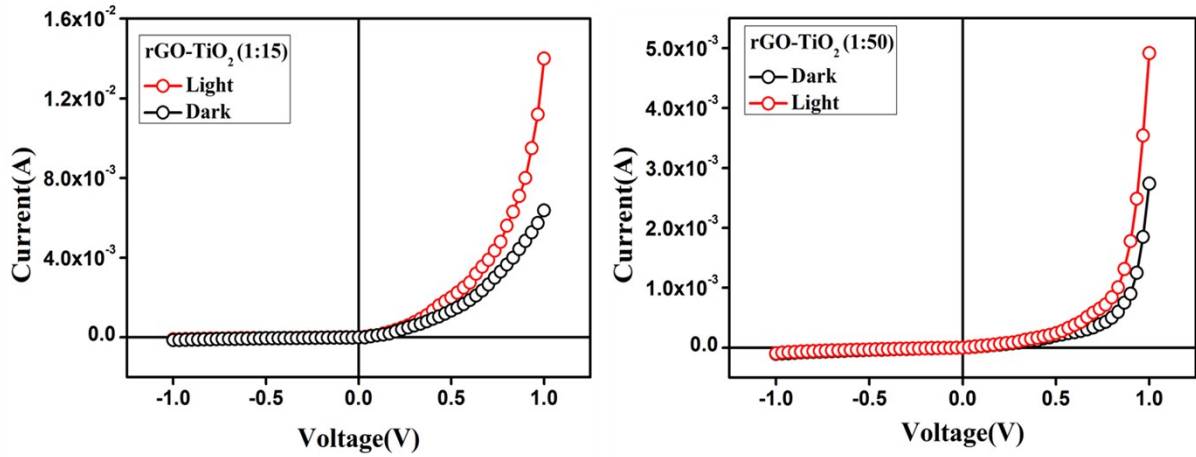

**Fig. S2** I-V plot for rGO-TiO<sub>2</sub> (1:15) and rGO-TiO<sub>2</sub> (1:50) under dark and photo condition

The  $dV/d\ln I$  vs  $I$  and  $H(I)$  vs  $I$  curves for rGO-TiO<sub>2</sub> composites under dark and photo condition are presented in Fig. S3. The ideality factor, barrier height and series resistance of the diodes were calculated and shown in Table S1. The data shows that the device performance improved for all the cases with rGO-TiO<sub>2</sub>, compared to pure TiO<sub>2</sub>.

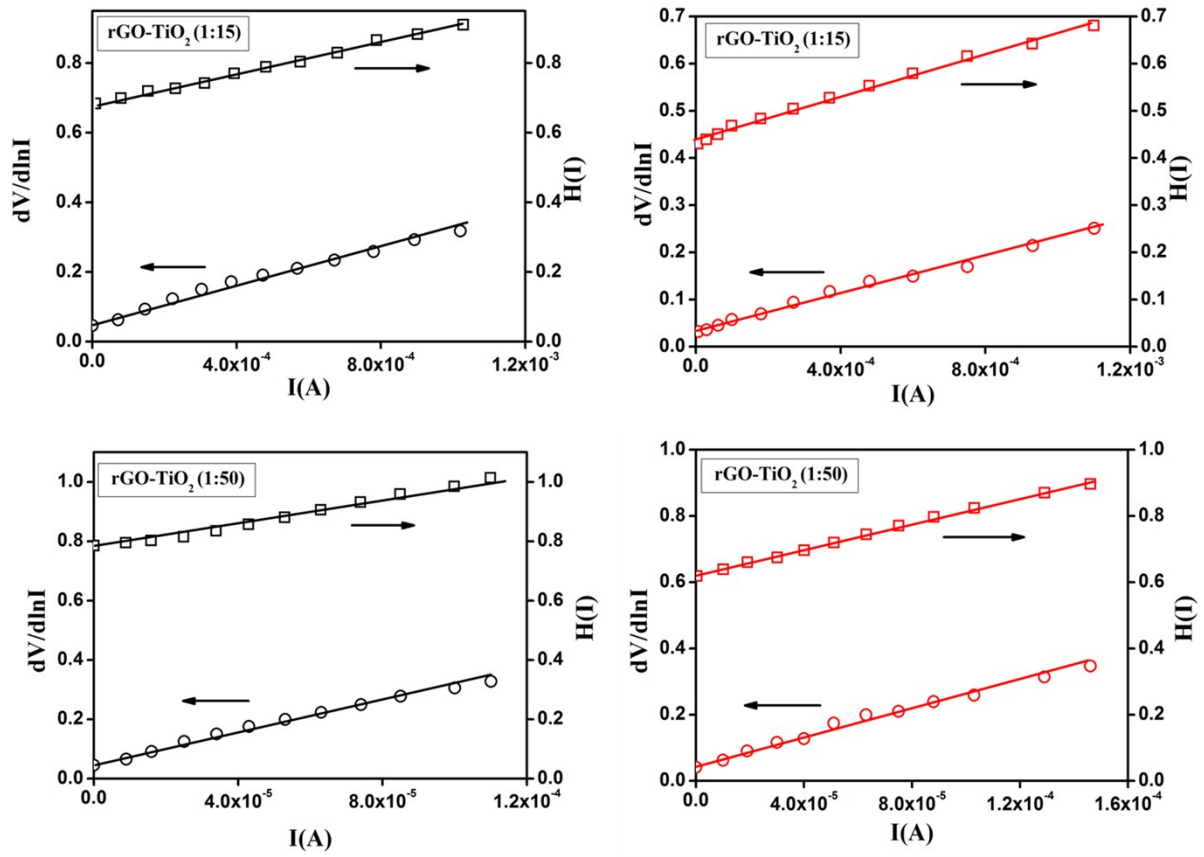

**Fig. S3**  $dV/d\ln I$  vs  $I$  and  $H(I)$  vs  $I$  curve for  $rGO-TiO_2$  (1:15) and  $rGO-TiO_2$  (1:50) under dark (black) and photo (red) condition.

**Table S1**

| Sample                | Cond <sup>n</sup> . | On/off | Photosensitivity | I.F. | $R_s$<br>( $dv/d\ln I$ )<br>( $k\Omega$ ) | $R_s(H)$<br>( $k\Omega$ ) | $\phi_b$<br>(eV) |
|-----------------------|---------------------|--------|------------------|------|-------------------------------------------|---------------------------|------------------|
| $rGO-TiO_2$<br>(1:15) | Dark                | 49     | 2.19             | 1.78 | 0.29                                      | 0.28                      | 0.38             |
|                       | Light               | 135    |                  | 1.24 | 0.23                                      | 0.24                      | 0.34             |
| $rGO-TiO_2$<br>(1:50) | Dark                | 31     | 1.55             | 1.76 | 2.8                                       | 2.4                       | 0.44             |
|                       | Light               | 51     |                  | 1.58 | 2.2                                       | 1.9                       | 0.39             |

**Table S1** | Schottky Diode parameters
